# Supplementary material for: The metal atomic substitution induced half-metallic properties, metallic properties and semiconducting properties in X–N4 nanoribbons
Source: Royal Society of Chemistry journal article supplement (doi:10.1039/d3cp03983h), 2023-01-01
Supplement: d3cp03983h1.pdf [file d3cp03983h1.pdf]

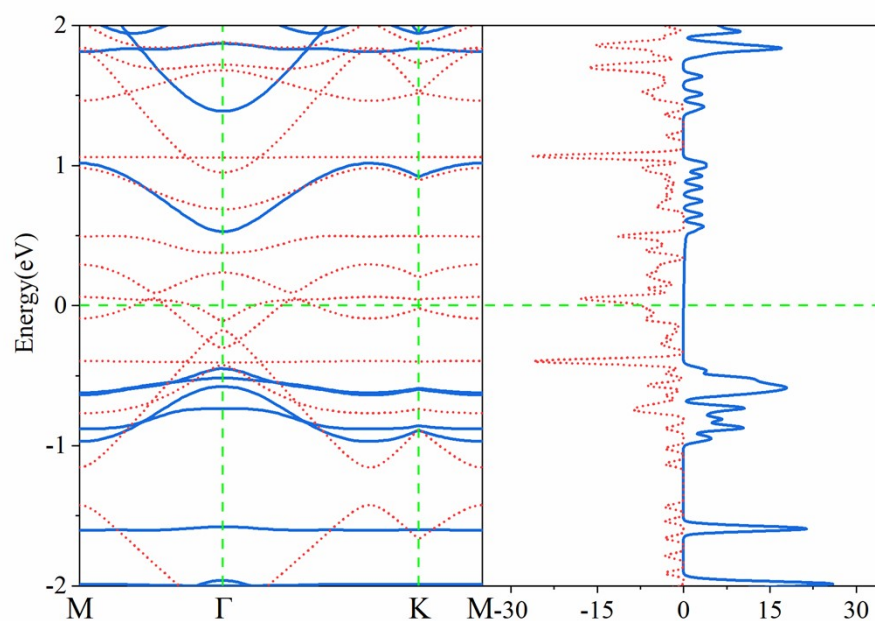

**Figure S1** DOS and energy band of Fe-ZN<sub>4</sub>NR obtained by using the HSE06 method.

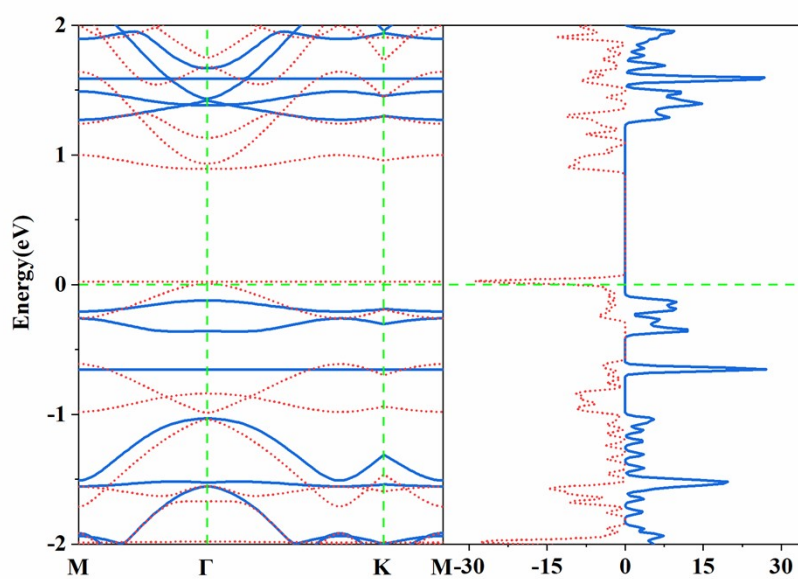

**Figure S2** DOS and energy band of Mn-AN<sub>4</sub>NR obtained by using the HSE06 method.
